# Supplementary material for: New heater@luminescent thermometer nano-objects: Prussian blue core@silica shell loaded with a β-diketonate Tb3+/Eu3+ complex
Source: Royal Society of Chemistry journal article supplement (doi:10.1039/d4qm00668b), 2024-11-20
Supplement: d4qm00668b1.pdf [file d4qm00668b1.pdf]

## Electronic Supplementary Materials

### New Heater@Luminescent Thermometer Nano-objects: Prussian Blue Core@Silica Shell loaded with $\beta$ -diketonate $\text{Tb}^{3+}/\text{Eu}^{3+}$ Complex

Aurore Larquey,<sup>†</sup> Houda Bellahsene,<sup>†</sup> Gautier Félix, Mickaël Beaudhuin, Tristan Pelluau, Basile Bouvet, Yannick Guari, Saad Sene\* and Joulia Larionova\*

ICGM, Univ Montpellier, CNRS, ENSCM, Montpellier, France

#### Contents

- Figure S1. a) IR spectra for  $[(\text{Tb}/\text{Eu})_9(\text{acac})_{16}(\mu_3\text{-OH})_8(\mu_4\text{-O})(\mu_4\text{-OH})] \cdot \text{H}_2\text{O}$  compound ( $\text{Tb}/\text{Eu} = 9/1$ ) (black) and  $\text{PB@SiO}_2\text{-acac}/(\text{Tb}/\text{Eu})_9$  nano-objects (green); b) Magnification of these spectra in the  $500 - 1800 \text{ cm}^{-1}$  window. 2
- Figure S2. Size distribution histograms for PB (a),  $\text{PB@SiO}_2$  (b),  $\text{PB@SiO}_2\text{-acac}$  (c) and  $\text{PB@SiO}_2\text{-acac}/(\text{Tb}/\text{Eu})_9$  (d) nano-objects. 3
- Figure S3. Size distribution histograms for the PB core of  $\text{PB@SiO}_2$  (a),  $\text{PB@SiO}_2\text{-acac}$  (b) and  $\text{PB@SiO}_2\text{-acac}/(\text{Tb}/\text{Eu})_9$  (c) nano-objects. 3
- Figure S4. Size distribution histograms for the silica shell of  $\text{PB@SiO}_2$  (a),  $\text{PB@SiO}_2\text{-acac}$  (b) and  $\text{PB@SiO}_2\text{-acac}/(\text{Tb}/\text{Eu})_9$  (c) nano-objects. 3
- Figure S5. a)  $\text{N}_2$  sorption isotherms of the  $\text{PB@SiO}_2$  and  $\text{PB@SiO}_2\text{-acac}/(\text{Tb}/\text{Eu})_9$  nano-objects; b) distribution of pore size of the  $\text{PB@SiO}_2$ . 4
- Figure S6. Temperature as a function of the time of the sample prepared for the extraction of the light-to-heat conversion coefficient irradiated with a 808 nm laser at a power of  $2.58 \text{ W.cm}^{-2}$  (blue curve) and its fit realized with the model developed and solved with the COMSOL software (red curve). ..... 4
- Figure S7. Specific heat of the pristine PB nano-object with the standard deviation obtained on 5 cycles. .... 5
- Figure S8. a) Excitation spectra of the  $[(\text{Tb}/\text{Eu})_9(\text{acac})_{16}(\mu_3\text{-OH})_8(\mu_4\text{-O})(\mu_4\text{-OH})] \cdot \text{H}_2\text{O}$  compound ( $\text{Tb}/\text{Eu} = 9/1$ ) monitored at  $\lambda_{\text{em}} = 547 \text{ nm}$  (green) and  $\lambda_{\text{em}} = 616 \text{ nm}$  (black) measured in solid state at room temperature; b) Emission spectra of the  $[(\text{Tb}/\text{Eu})_9(\text{acac})_{16}(\mu_3\text{-OH})_8(\mu_4\text{-O})(\mu_4\text{-OH})] \cdot \text{H}_2\text{O}$  ( $\text{Tb}/\text{Eu} = 9/1$ ) compound performed at room temperature in solid state with the excitation at  $\lambda_{\text{em}} = 325 \text{ nm}$ .  $\text{Eu}^{3+}$  and  $\text{Tb}^{3+}$  linked transitions are labelled in red and green, respectively. .... 5

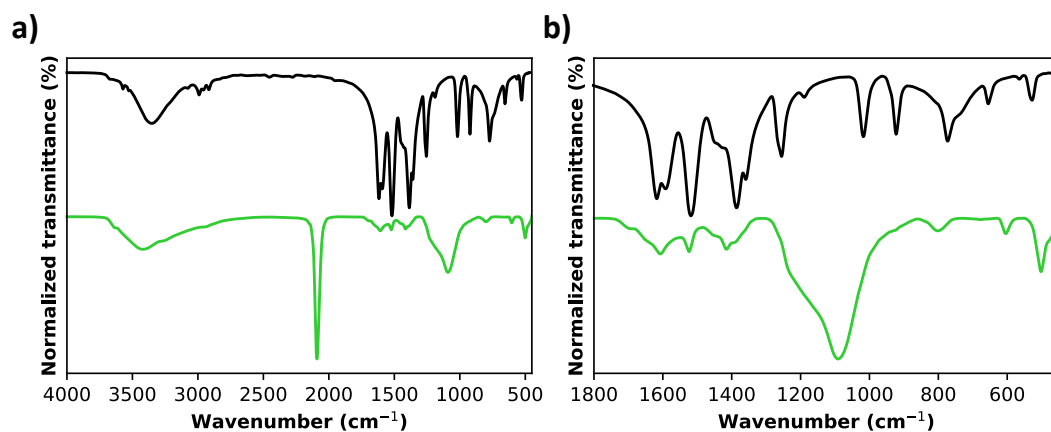

**Figure S1.** a) IR spectra for [(Tb/Eu)<sub>9</sub>(acac)<sub>16</sub>(μ<sub>3</sub>-OH)<sub>8</sub>(μ<sub>4</sub>-O)(μ<sub>4</sub>-OH)] H<sub>2</sub>O compound (Tb/Eu = 9/1) (black) and PB@SiO<sub>2</sub>-acac/(Tb/Eu)<sub>9</sub> nano-objects (green); b) Magnification of these spectra in the 500 - 1800 cm<sup>-1</sup> window.

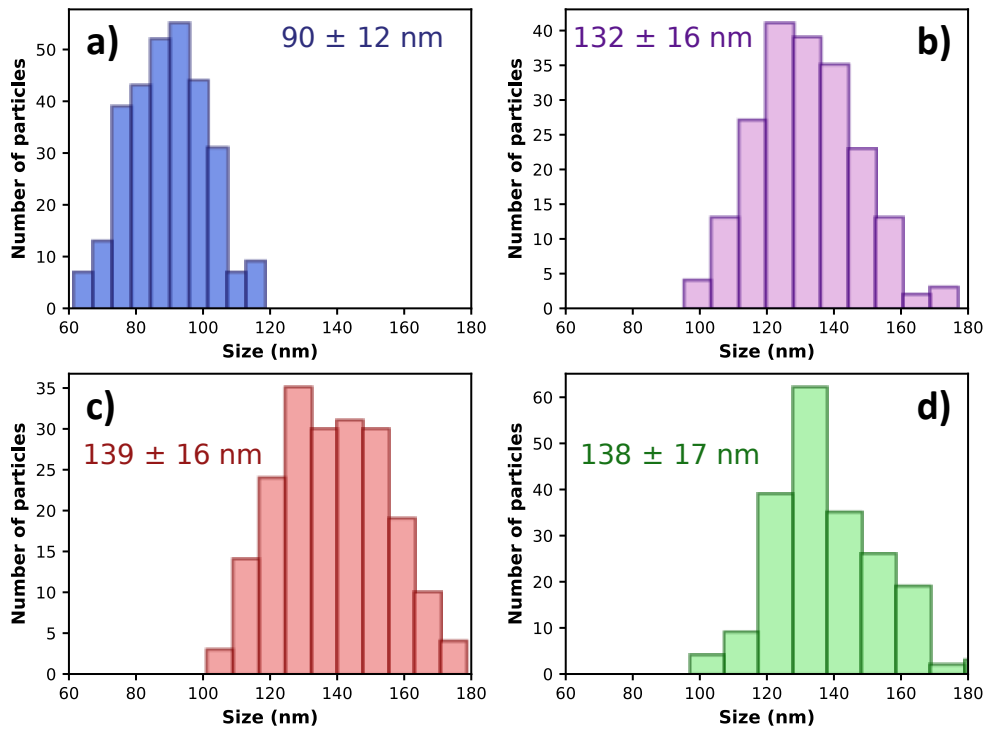

**Figure S2.** Size distribution histograms for PB (a), PB@SiO<sub>2</sub> (b), PB@SiO<sub>2</sub>-acac (c) and PB@SiO<sub>2</sub>-acac/(Tb/Eu)<sub>9</sub> (d) nano-objects.

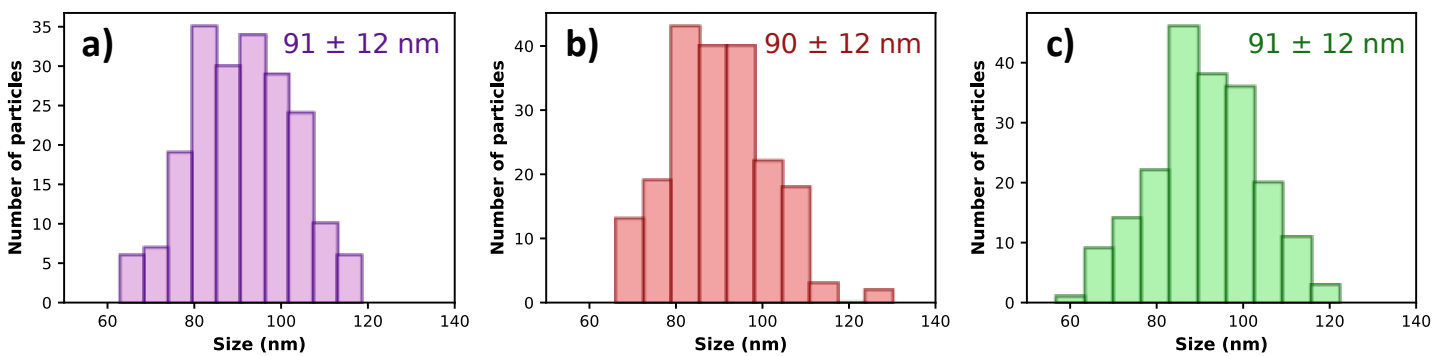

**Figure S3.** Size distribution histograms for the PB core of PB@SiO<sub>2</sub> (a), PB@SiO<sub>2</sub>-acac (b) and PB@SiO<sub>2</sub>-acac/(Tb/Eu)<sub>9</sub> (c) nano-objects.

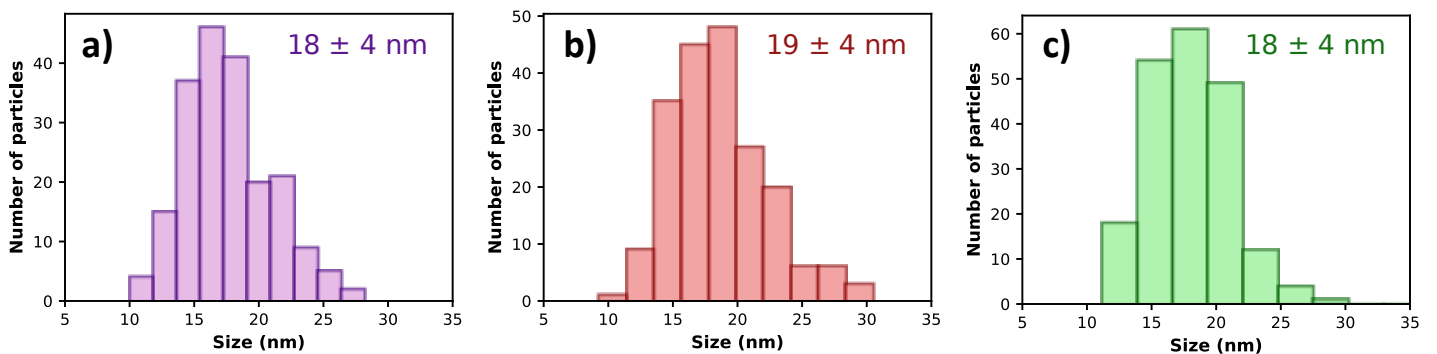

**Figure S4.** Size distribution histograms for the silica shell of PB@SiO<sub>2</sub> (a), PB@SiO<sub>2</sub>-acac (b) and PB@SiO<sub>2</sub>-acac/(Tb/Eu)<sub>9</sub> (c) nano-objects.

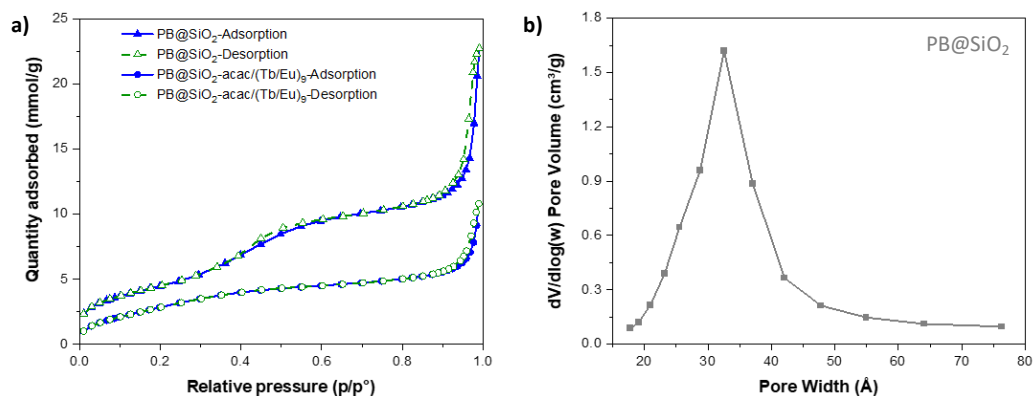

**Figure S5.** a) N<sub>2</sub> sorption isotherms of the PB@SiO<sub>2</sub> and PB@SiO<sub>2</sub>-acac/(Tb/Eu)<sub>9</sub> nano-objects; b) distribution of pore size of the PB@SiO<sub>2</sub>.

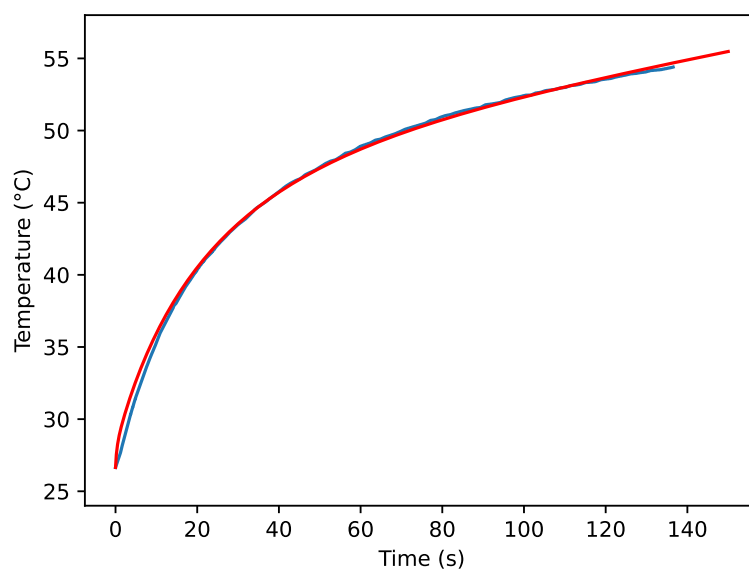

**Figure S6.** Temperature as a function of the time of the sample prepared for the extraction of the light-to-heat conversion coefficient irradiated with a 808 nm laser at a power of  $2.58 \text{ W}\cdot\text{cm}^{-2}$  (blue curve) and its fit realized with the model developed and solved with the COMSOL software (red curve).

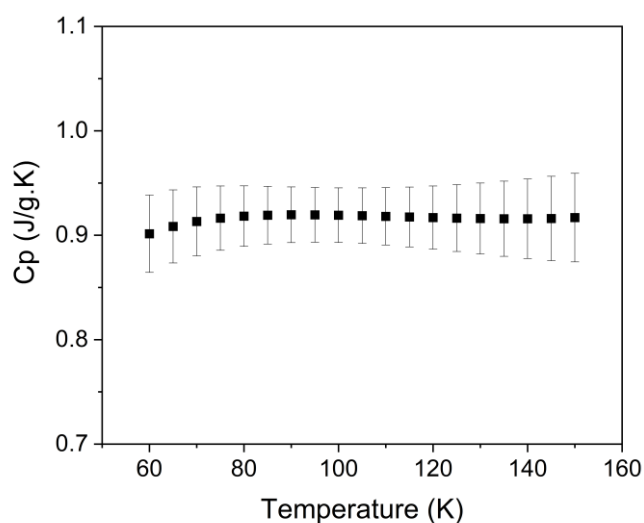

**Figure S7.** Specific heat of the pristine PB nano-object with the standard deviation obtained on 5 cycles.

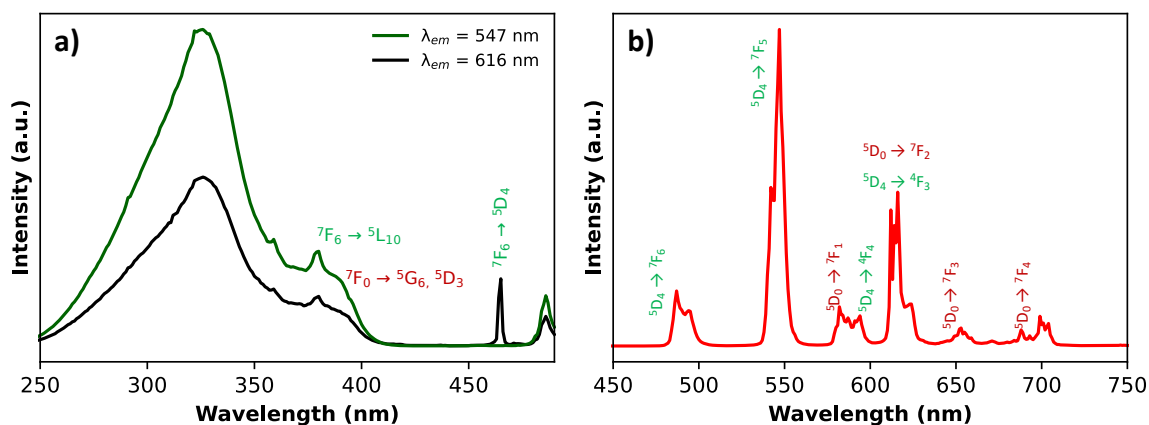

**Figure S8.** a) Excitation spectra of the  $[(\text{Tb}/\text{Eu})_9(\text{acac})_{16}(\mu_3\text{-OH})_8(\mu_4\text{-O})(\mu_4\text{-OH})]\cdot\text{H}_2\text{O}$  compound ( $\text{Tb}/\text{Eu} = 9/1$ ) monitored at  $\lambda_{\text{em}} = 547$  nm (green) and  $\lambda_{\text{em}} = 616$  nm (black) measured in solid state at room temperature; b) Emission spectra of the  $[(\text{Tb}/\text{Eu})_9(\text{acac})_{16}(\mu_3\text{-OH})_8(\mu_4\text{-O})(\mu_4\text{-OH})]\cdot\text{H}_2\text{O}$  ( $\text{Tb}/\text{Eu} = 9/1$ ) compound performed at room temperature in solid state with the excitation at  $\lambda_{\text{em}} = 325$  nm.  $\text{Eu}^{3+}$  and  $\text{Tb}^{3+}$  linked transitions are labelled in red and green, respectively.
